# Supplementary material
Source: HighWire-hosted journal article supplement (https://erj.ersjournals.com/content/59/1/2100014)
Supplement: inline-supplementary-material-1 [file inline-supplementary-material-1.pdf]

## **Data Supplement**

### **The Impact of the High Emergency Lung Transplantation program in Cystic Fibrosis in France: insight from a comparison with Canada**

Adèle Coriati, Jenna Sykes, Lydie Lemonnier, Xiayi Ma, Sanja Stanojevic, Clémence Dehillotte,  
Nicolas Carlier, Anne L. Stephenson, Pierre-Régis Burgel

## **Registry Variables**

Variables in the FCFR and CCFR were harmonized. The most recent measurements within the study window, including both the transplanted and non-transplanted patients, were summarized in both countries. The CCFR started recording BiPAP since 2011; therefore proportions are calculated as of 2011 for both France and Canada for this variable.

## **Transplant programs**

There are a total of 4 transplant programs in Canada, 2 of which also do pediatric transplants. It is estimated that between 50-60% of Canadian transplants are done at the Toronto transplant center. In France, there are 10 lung transplant programs. Contrary to France, Canada does not have a national, standardized priority allocation system for listed patients. However, center-specific medical priority drives transplant allocation where the sickest patients are the highest priority [1]. In Canada, patients with CF < 18 years of age are prioritized for lung allocation in the same way as adults. However in France, children with CF < 18 years of age have national priority over adults with CF.

## **Additional Tables Referenced in the Text**

**Table 1S. Deaths and transplants in Canada and France (2002-2016).**

|                                       | <b>France</b>    | <b>Canada</b>    | <b>P value</b> | <b>SMD</b> |
|---------------------------------------|------------------|------------------|----------------|------------|
| Total number of patients, n           | 8266             | 5451             |                |            |
| Number of deaths, n(%)                | 826 (10.0)       | 692 (12.7)       | < 0.001        | 8.5        |
| Death after transplant                |                  |                  |                |            |
| Yes, n (% of total deaths)            | 314 (38.0)       | 180 (26.0)       | 0.139          | 2.7        |
| No, n (% of total deaths)             | 512 (62.0)       | 512 (74.0)       | < 0.001        | 12.0       |
| Age at death (yrs)                    | 24.7 (19.4-32.2) | 28.9 (22.3-39.2) | < 0.001        | 32.7       |
| Age at death with transplant (yrs)    | 25.9 (21.2-32.3) | 30.5 (24.4-39.3) | < 0.001        | 50.0       |
| Age at death without transplant (yrs) | 23.5 (18.0-32.1) | 28.2 (21.3-39.0) | < 0.001        | 28.6       |
| Number of transplants, n (%)          | 1075 (13.0)      | 555 (10.2)       |                | 8.8        |
| Pediatric, n (% of total transplants) | 174 (16.2)       | 43 (7.7)         | < 0.001        | 26.2       |
| Adult, n (% of total transplants)     | 901 (83.8)       | 512 (93.3)       |                | 26.2       |
| Age at transplant (yrs)               | 26.1 (20.9-32.9) | 28.6 (23.7-36.2) | < 0.001        | 31.0       |
| Pediatric (years)                     | 16.5 (14.1-18.0) | 15.9 (13.2-17.9) | 0.619          | 8.4        |
| Adult (years)                         | 28.1 (23.6-34.0) | 29.8 (24.8-36.2) | < 0.001        | 22.1       |

Data are presented as Median (Interquartile range). SMD: standard mean difference. P value was assessed using the Mann-Whitney test for continuous variables and the Chi-squared test for categorical variables.

**Table 2S. Characteristics of all patients (with and without a lung transplant) pre-high emergency lung transplantation (HELT) (2002-2006) and post-HELT (2008-2016) at the most recent measurement of study window and are censored at date of transplant in Canada and France.**

|                                  | Pre-HELT (2002-2006) |                  |      |         | Post-HELT (2008-2016) |                  |      |         |
|----------------------------------|----------------------|------------------|------|---------|-----------------------|------------------|------|---------|
|                                  | France               | Canada           | SMD  | P Value | France                | Canada           | SMD  | P Value |
| Total number of patients, n      | 5505                 | 3908             |      |         | 7442                  | 4929             |      |         |
| Sex                              |                      |                  |      |         |                       |                  |      |         |
| Women, n(%)                      | 2633 (47.8)          | 1818 (46.5)      | 2.6  | 0.218   | 3525 (47.4)           | 2288 (46.4)      | 1.9  | 0.310   |
| Men, n(%)                        | 2872 (52.2)          | 2090 (53.5)      |      |         | 3917 (52.6)           | 2641 (53.6)      |      |         |
| Genotype                         |                      |                  |      |         |                       |                  |      |         |
| Phe508del homozygote, n(%)       | 2409 (43.8)          | 1981 (50.7)      | 13.9 | < 0.001 | 2959 (39.8)           | 2305 (46.8)      | 14.2 | < 0.001 |
| Phe508del heterozygote, n(%)     | 2213 (40.2)          | 1466 (37.5)      | 5.5  |         | 3147 (42.3)           | 1966 (39.9)      | 4.9  |         |
| Other, n(%)                      | 750 (13.6)           | 392 (10.0)       | 11.1 |         | 1181 (15.9)           | 565 (11.5)       | 12.9 |         |
| Missing, n(%)                    | 133 (2.4)            | 69 (1.8)         | 4.5  |         | 155 (2.1)             | 93 (1.9)         | 1.4  |         |
| Pancreatic status, ever/never    |                      |                  |      |         |                       |                  |      |         |
| Insufficient, n(%)               | 5077 (92.2)          | 3460 (88.5)      | 12.6 | < 0.001 | 6373 (85.6)           | 4073 (82.6)      | 8.3  | < 0.001 |
| Sufficient, n(%)                 | 427 (7.8)            | 448 (11.5)       |      |         | 1066 (14.3)           | 856 (17.4)       |      |         |
| NA, n(%)                         | 1 (0)                | 0 (0)            |      |         | 3 (0)                 | 0 (0)            |      |         |
| CFRD, ever/never                 |                      |                  |      |         |                       |                  |      |         |
| Yes, n(%)                        | 844 (15.3)           | 602 (15.4)       | 0.2  | 0.698   | 1760 (23.7)           | 1150 (23.3)      | 0.8  | 0.339   |
| No, n(%)                         | 4660 (84.7)          | 3306 (84.6)      |      |         | 5679 (76.3)           | 3779 (76.7)      |      |         |
| NA, n(%)                         | 1 (0.0)              | 0 (0)            |      |         | 3 (0.0)               | 0 (0)            |      |         |
| Microbiology, ever/never         |                      |                  |      |         |                       |                  |      |         |
| <i>P. aeruginosa</i> , n(%)      | 3435 (62.4)          | 2702 (69.2)      | 14.3 | < 0.001 | 5174 (69.6)           | 3531 (71.6)      | 4.6  | 0.014   |
| <i>B. cepacia</i> complex, n(%)  | 196 (3.6)            | 300 (7.7)        | 18.0 | < 0.001 | 332 (4.5)             | 450 (9.1)        | 18.6 | < 0.001 |
| Nbr Pulmonary Exacerbations/year |                      |                  |      |         |                       |                  |      |         |
| 0, n(%)                          | 3939 (71.6)          | 2813 (72.1)      | 1.1  | < 0.001 | 5049 (68.0)           | 3305 (67.2)      | 1.8  | < 0.001 |
| 1-2, n(%)                        | 1072 (19.5)          | 862 (22.1)       | 6.4  |         | 1542 (20.7)           | 1232 (25.0)      | 10.2 |         |
| ≥ 3, n(%)                        | 488 (8.9)            | 226 (5.8)        | 11.8 |         | 837 (11.3)            | 385 (7.8)        | 11.7 |         |
| Medication                       |                      |                  |      |         |                       |                  |      |         |
| Feeding tube, n(%)               | 408 (7.4)            | 172 (4.4)        | 12.8 | < 0.001 | 569 (7.7)             | 265 (5.4)        | 9.2  | < 0.001 |
| BiPAP, n(%)* as of 2011          | -                    | -                | -    | -       | 535 (7.2)             | 69 (1.4)         | 28.9 | < 0.001 |
| Oxygen, n(%)                     | 615 (11.2)           | 219 (5.6)        | 20.2 | < 0.001 | 943 (12.7)            | 419 (8.5)        | 13.6 | < 0.001 |
| ppFEV1                           | 67.7 (42.0-89.6)     | 71.2 (48.2-89.9) | 10.5 | < 0.001 | 75.3 (46.6-95.8)      | 72.1 (45.9-94.0) | 4.7  | < 0.001 |
| <40, n(%)                        | 872 (15.9)           | 520 (13.3)       | 13.5 | < 0.001 | 1193 (16.1)           | 760 (15.4)       | 0.1  | 0.002   |
| 40-69, n(%)                      | 1132 (20.6)          | 928 (23.8)       | 3.3  |         | 1487 (20.0)           | 1060 (21.5)      | 6.9  |         |
| ≥70, n(%)                        | 1789 (32.5)          | 1510 (38.7)      | 7.8  |         | 3300 (44.4)           | 1979 (40.2)      | 6.2  |         |

|                                     | Pre-HELT (2002-2006) |             |      |         | Post-HELT (2008-2016) |             |      |         |
|-------------------------------------|----------------------|-------------|------|---------|-----------------------|-------------|------|---------|
| NA, n(%)                            | 1706 (31.0)          | 943 (24.2)  |      |         | 1448 (19.5)           | 1123 (22.8) |      |         |
| BMI categories (adult and children) |                      |             |      |         |                       |             |      |         |
| Underweight, n(%)                   | 1443 (26.2)          | 542 (13.9)  | 37.2 | < 0.001 | 1562 (21.0)           | 614 (12.4)  | 24.3 | < 0.001 |
| Normal, n(%)                        | 3003 (54.6)          | 2524 (64.7) | 15.6 |         | 4567 (61.5)           | 3075 (62.5) | 2.4  |         |
| Overweight, n(%)                    | 274 (5.0)            | 494 (12.7)  | 27.3 |         | 665 (9.0)             | 811 (16.5)  | 24.0 |         |
| NA, n(%)                            | 779 (14.2)           | 341 (8.7)   |      |         | 634 (8.5)             | 422 (8.6)   |      |         |

Data are presented as Median (Interquartile range). FEV1 percent predicted values were calculated using the GLI equations HELT: high emergency lung transplantation, CFRD: cystic fibrosis-related diabetes, BMI: body mass index, ppFEV1: percent predicted forced expiratory volume in 1 second, SMD: standard mean difference. *P. aeruginosa*: pseudomonas aeruginosa, *B. cepacia* complex: burkholderia *cepacia* complex, BiPAP: bilevel positive airway pressure. P value was assessed using the Mann-Whitney test for continuous variables and the Chi-squared test for categorical variables.

**Table 3S. Competing risk regression model, analysis for receiving a lung transplant or death (without a lung transplant), for pre-HELТ (2002-2006) and post-HELТ (2008-2016) program.**

The competing risk regression models were used to estimate the subdistribution hazard of receiving a transplant or dying by country after adjusting for gender, age at diagnosis, pancreatic status, genotype, and the following information at the time of entry into the cohort: patient age, BMI, infection with *B. cepacia*, CFRD, the number of pulmonary exacerbations in a year and ppFEV<sub>1</sub>.

| Variables                          | Transplant            |         |                       |         | Death                 |         |                       |         |
|------------------------------------|-----------------------|---------|-----------------------|---------|-----------------------|---------|-----------------------|---------|
|                                    | Pre-HELТ              |         | Post-HELТ             |         | Pre-HELТ              |         | Post-HELТ             |         |
|                                    | Hazard Ratio (95% CI) | P Value |
| Country (France vs Canada)         | 1.08 (0.89-1.32)      | 0.44    | 1.56 (1.37-1.77)      | <0.001  | 0.99 (0.81-1.21)      | 0.91    | 0.55 (0.46-0.66)      | <0.001  |
| Gender (men vs women)              | 1.19 (0.98-1.45)      | 0.08    | 1.15 (1.02-1.29)      | 0.03    | 1.29 (1.05-1.57)      | 0.01    | 1.28 (1.07-1.53)      | 0.01    |
| Age at diagnosis ( $\geq 2$ yrs)   | 0.88 (0.71-1.09)      | 0.23    | 0.82 (0.72-0.94)      | 0.004   | 0.72 (0.58-0.9)       | 0.004   | 1.07 (0.89-1.3)       | 0.45    |
| Pancreatic Status (PI vs PS)       | 3.68 (1.96-6.89)      | <0.001  | 7.11 (4.75-10.66)     | <0.001  | 1.51 (0.99-2.31)      | 0.05    | 1.76 (1.27-2.44)      | <0.001  |
| <i>B cepacia</i> complex           | 1.97 (1.45-2.69)      | <0.001  | 1.21 (0.98-1.51)      | 0.08    | 3.41 (2.63-4.43)      | <0.001  | 2.91 (2.29-3.68)      | <0.001  |
| CFRD                               | 9.13 (7.42-11.23)     | <0.001  | 10.4 (9.01-12.01)     | <0.001  | 2.73 (2.23-3.36)      | <0.001  | 2.31 (1.93-2.77)      | <0.001  |
| Heterozygote vs Homozygote         | 0.63 (0.5-0.78)       | <0.001  | 0.62 (0.55-0.71)      | <0.001  | 0.93 (0.75-0.1.16)    | 0.54    | 0.85 (0.7-1.04)       | 0.11    |
| Other vs Homozygote                | 0.46 (0.31-0.69)      | <0.001  | 0.57 (0.47-0.7)       | <0.001  | 0.95 (0.68-1.33)      | 0.76    | 0.77 (0.57-1.03)      | 0.08    |
| Age                                | 1.04 (1.04-1.05)      | <0.001  | 1.03 (1.03-1.03)      | <0.001  | 1.03 (1.03-1.04)      | <0.001  | 1.05 (1.04-1.05)      | <0.001  |
| Overweight vs Normal               | 0.5 (0.29-0.88)       | 0.02    | 0.42 (0.3-0.58)       | <0.001  | 0.72 (0.44-1.16)      | 0.18    | 0.89 (0.64-1.25)      | 0.51    |
| Underweight vs Normal              | 2.81 (2.3-3.44)       | <0.001  | 2.91 (2.57-3.3)       | <0.001  | 2.85 (2.32-3.49)      | <0.001  | 2.18 (1.8-2.65)       | <0.001  |
| percent predicted FEV <sub>1</sub> | 0.92 (0.92-0.93)      | <0.001  | 0.93 (0.93-0.94)      | <0.001  | 0.95 (0.94-0.95)      | <0.001  | 0.96 (0.95-0.96)      | <0.001  |
| PEx/year                           | 1.37 (1.31-1.44)      | <0.001  | 1.29 (1.2-1.39)       | <0.001  | 1.38 (1.32-1.45)      | <0.001  | 1.26 (1.18-1.35)      | <0.001  |

HELТ: high emergency lung transplantation, CFRD: Cystic fibrosis related diabetes, FEV<sub>1</sub>: forced expiratory volume in 1 second, PI: pancreatic insufficient, PS: pancreatic sufficient, PEx: pulmonary exacerbation.

**Table 4S. Characteristics of patients who received a lung transplant pre-high emergency lung transplantation (HELT) (2002-2006) and post-HELT (2008-2016) as most recent value 3 years prior to transplant in Canada and France.**

|                                  | Pre-HELT (2002-2006) |                  |      |         | Post-HELT (2008-2016) |                  |      |         |
|----------------------------------|----------------------|------------------|------|---------|-----------------------|------------------|------|---------|
|                                  | France               | Canada           | SMD  | P Value | France                | Canada           | SMD  | P Value |
| Total number of patients, n      | 248                  | 173              |      |         | 755                   | 340              |      |         |
| Pediatric, n(%)                  | 51 (20.6)            | 16 (9.2)         | 32.2 | 0.003   | 105 (13.9)            | 22 (6.5)         | 24.8 | < 0.001 |
| Adult, n(%)                      | 197 (79.4)           | 157 (90.8)       |      |         | 650 (86.1)            | 318 (93.5)       |      |         |
| Sex                              |                      |                  |      |         |                       |                  |      |         |
| Women, n(%)                      | 133 (53.6)           | 83 (48.0)        | 11.3 | 0.297   | 387 (51.3)            | 165 (48.5)       | 5.5  | 0.441   |
| Men, n(%)                        | 115 (46.4)           | 90 (52.0)        |      |         | 368 (48.7)            | 175 (51.5)       |      |         |
| Genotype                         |                      |                  |      |         |                       |                  |      |         |
| Phe508del homozygote, n(%)       | 140 (56.5)           | 108 (62.4)       | 12.2 | 0.181   | 404 (53.5)            | 204 (60.0)       | 13.1 | 0.188   |
| Phe508del heterozygote, n(%)     | 78 (31.4)            | 52 (30.0)        | 3.0  |         | 266 (35.2)            | 100 (29.4)       | 12.5 |         |
| Other, n(%)                      | 25 (10.1)            | 8 (4.6)          | 21.0 |         | 79 (10.5)             | 32 (9.4)         | 3.5  |         |
| Missing, n(%)                    | 5 (2.0)              | 5 (2.9)          | 5.7  |         | 6 (0.8)               | 4 (1.2)          | 3.9  |         |
| Pancreatic status, ever/never    |                      |                  |      |         |                       |                  |      |         |
| Insufficient, n(%)               | 244 (98.4)           | 165 (95.4)       | 17.4 | 0.126   | 746 (98.8)            | 324 (95.3)       | 20.9 | < 0.001 |
| Sufficient, n(%)                 | 4 (1.6)              | 8 (4.6)          |      |         | 9 (1.2)               | 16 (4.7)         |      |         |
| CFRD, ever/never                 |                      |                  |      |         |                       |                  |      |         |
| Yes, n(%)                        | 133 (53.6)           | 76 (43.9)        | 19.5 | 0.063   | 454 (60.1)            | 169 (49.7)       | 21.1 | 0.002   |
| No, n(%)                         | 115 (46.4)           | 97 (56.1)        |      |         | 301 (39.9)            | 1711 (50.3)      |      |         |
| Microbiology, ever/never         |                      |                  |      |         |                       |                  |      |         |
| <i>P. aeruginosa</i> , n(%)      | 236 (95.2)           | 160 (92.5)       | 11.1 | 0.351   | 737 (97.6)            | 330 (97.1)       | 3.5  | 0.739   |
| <i>B. cepacia</i> complex, n(%)  | 28 (11.3)            | 29 (16.8)        | 15.8 | 0.142   | 61 (8.1)              | 57 (16.8)        | 26.6 | < 0.001 |
| Nbr Pulmonary Exacerbations/year |                      |                  |      |         |                       |                  |      |         |
| 0, n(%)                          | 36 (15.3)            | 30 (18.0)        | 7.3  | < 0.001 | 95 (12.8)             | 73 (21.7)        | 23.6 | < 0.001 |
| 1-2, n(%)                        | 79 (33.5)            | 85 (50.9)        | 35.8 |         | 236 (31.8)            | 147 (43.6)       | 24.5 |         |
| ≥ 3, n(%)                        | 121 (51.3)           | 52 (31.1)        | 41.8 |         | 410 (55.3)            | 117 (34.7)       | 42.3 |         |
| Medication                       |                      |                  |      |         |                       |                  |      |         |
| Feeding tube, n(%)               | 83 (35.2)            | 39 (23.4)        | 26.2 | 0.015   | 234 (31.6)            | 67 (19.9)        | 27.0 | < 0.001 |
| BiPAP, n(%)* as of 2011          | -                    | -                | -    | -       | 263 (35.5)            | 38 (11.3)        | 59.7 | < 0.001 |
| Oxygen, n(%)                     | 201 (85.2)           | 103 (61.7)       | 55.2 | < 0.001 | 571 (77.1)            | 222 (65.9)       | 25.0 | < 0.001 |
| ppFEV1                           | 21.7 (17.6-27.9)     | 23.3 (19.6-29.7) | 6.5  | 0.131   | 26.0 (20.9-33.2)      | 25.1 (20.4-30.5) | 23.3 | 0.039   |
| <40, n(%)                        | 186 (78.8)           | 138 (82.6)       | 32.6 | 0.019   | 610 (82.3)            | 273 (81.0)       | 22.3 | 0.009   |
| 40-69, n(%)                      | 12 (5.1)             | 2 (1.2)          | 24.0 |         | 74 (10.0)             | 16 (4.7)         | 18.9 |         |
| ≥70, n(%)                        | 5 (2.1)              | 0 (0)            | 22.5 |         | 11 (1.5)              | 1 (0.3)          | 12.7 |         |

|                                      | Pre-HELT (2002-2006) |           |      |         | Post-HELT (2008-2016) |            |      |         |
|--------------------------------------|----------------------|-----------|------|---------|-----------------------|------------|------|---------|
|                                      | France               | Canada    | SMD  | P Value | France                | Canada     | SMD  | P Value |
| NA, n(%)                             | 33 (14.0)            | 27 (16.2) |      |         | 46 (6.2)              | 47 (14.0)  |      |         |
| BMI categories, (adult and children) |                      |           |      |         |                       |            |      |         |
| Underweight, n(%)                    | 141 (59.7)           | 41 (24.6) | 62.4 | < 0.001 | 396 (53.4)            | 96 (28.5)  | 47.3 | < 0.001 |
| Normal, n(%)                         | 84 (35.6)            | 97 (58.1) | 20.1 |         | 319 (43.0)            | 184 (54.6) | 34.7 |         |
| Overweight, n(%)                     | 4 (1.7)              | 8 (4.8)   | 71.5 |         | 9 (1.2)               | 21 (6.2)   | 29.2 |         |
| NA, n(%)                             | 7 (3.0)              | 21 (12.6) |      |         | 17 (2.43)             | 36 (10.7)  |      |         |

Data are presented as Median (Interquartile range). FEV1 predicted values were calculated using the GLI equations. HELT: high emergency lung transplantation, CFRD: cystic fibrosis-related diabetes, BMI: body mass index, ppFEV1: percent predicted forced expiratory volume in 1 second, SMD: standard mean difference, P. aeruginosa: pseudomonas aeruginosa, B. cepacia complex: burkholderia *cepacia complex*, BiPAP: bilevel positive airway pressure. P value was assessed using the Mann-Whitney test for continuous variables and the Chi-squared test for categorical variables.

**Additional Figure Referenced in the text**

**Figure 1S. Proportion of deaths in French and Canadian CF patients with low lung function ( $FEV_1 < 40\%$ ) who did not received a lung transplant throughout the study period (2002-2016).**

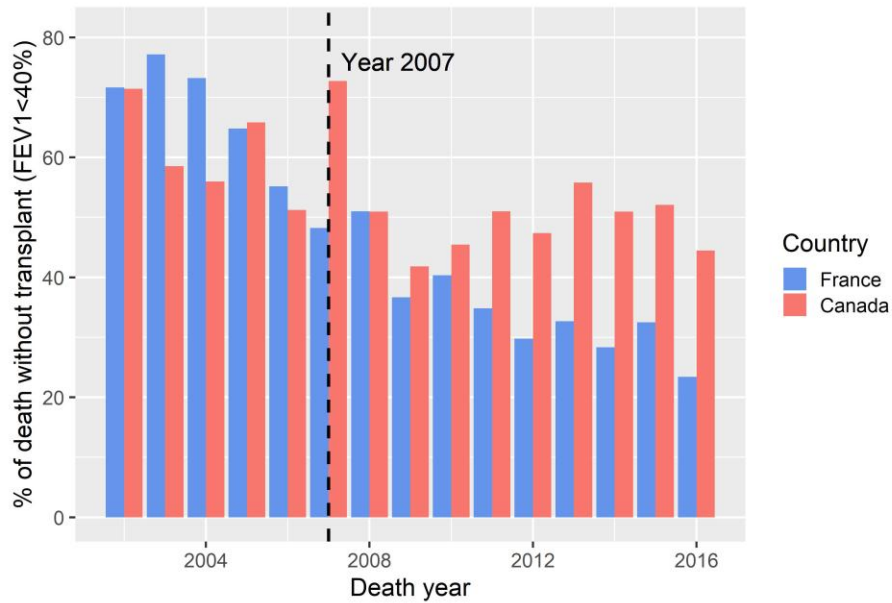

Footnote: Year 2007 is the year that the high emergency lung transplant program was implemented in France.  $FEV_1$ : forced expiratory volume in 1 second.



**Figure 2S. Patient selection from the French (FCFR) and Canadian (CCFR) CF registries for the competing risk analysis in the A) pre-HELT (2002-2006) and the B) post-HELT (2008-2016) periods.** HELT: high emergency transplantation, BMI: body mass index, ppFEV1: percent predicted forced expiratory volume in 1 sec.

A)

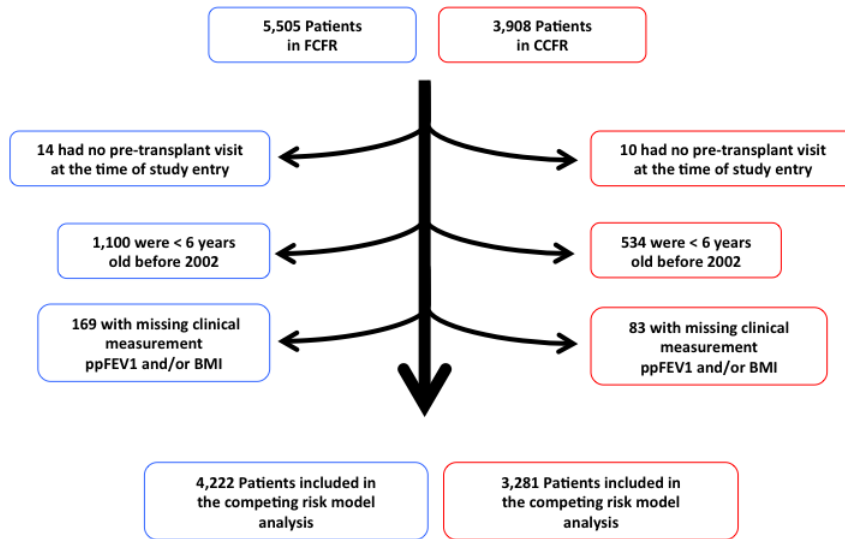

B)

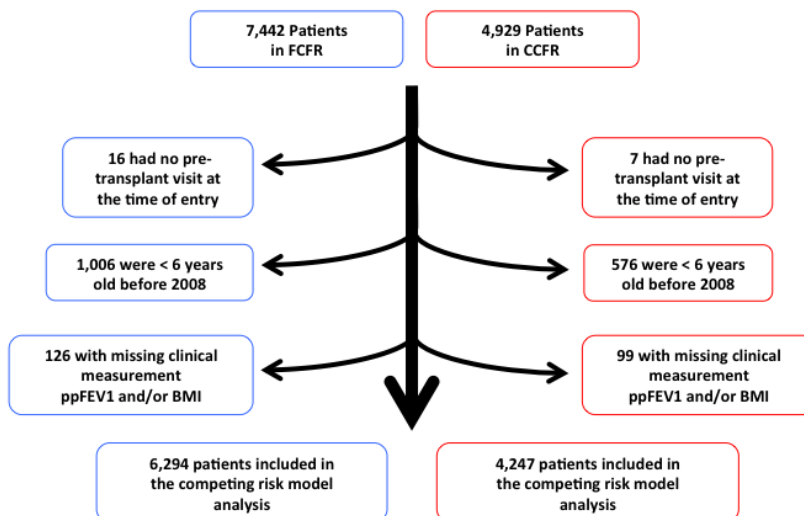

**Figure 3S. Post-transplant survival of CF patients without *B. cepacia* complex in Canada and France A) pre-HELT (2002-2006) and B) post-HELT (2008-2016) program. HELT: high emergency lung transplantation.**

A)

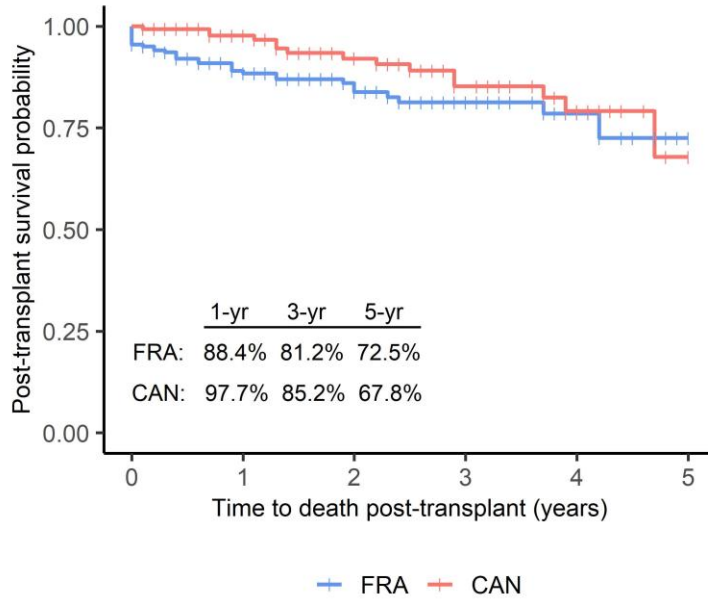

B)

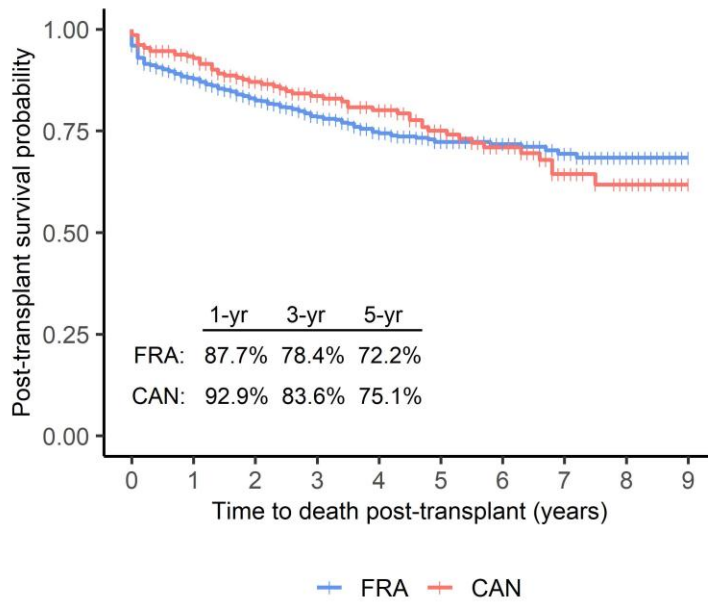

## References

1. Yeung JC, Machuca TN, Chaparro C, Cypel M, Stephenson AL, Solomon M, Saito T, Binnie M, Chow CW, Grasmann H, Pierre AF, Yasufuku K, de Perrot M, Donahoe LL, Tikkanen J, Martinu T, Waddell TK, Tullis E, Singer LG, Keshavjee S. Lung transplantation for cystic fibrosis. *J Heart Lung Transplant.* 2020;39(6):553-60.
